# Supplementary material for: Synthesis, crystal structure, and optical characteristics of [Pd2Hg4Cl6{Te(DMB)}6]·2DMF, [HgClTe(DMB)]4, and the ring-forming cluster [Pd12(TePh)24]·2DMF
Source: Royal Society of Chemistry journal article supplement (doi:10.1039/c3nj01455j), 2014-01-01
Supplement: c3nj01455j1.pdf [file c3nj01455j1.pdf]

**New Journal of Chemistry - Electronic Supplementary Information**

**Synthesis, crystal structure, and optical characteristics of  $[\text{Pd}_2\text{Hg}_4\text{Cl}_6\{\text{Te}(\text{DMB})\}_6]\cdot 2\text{DMF}$ ,  $[\text{HgClTe}(\text{DMB})]_4$ , and the ring-forming cluster  $[\text{Pd}_{12}(\text{TePh})_{24}]\cdot 2\text{DMF}$**

**Barbara Tirloni,<sup>a</sup> Ernesto Schulz Lang,<sup>\*b</sup> Gelson Manzoni de Oliveira,<sup>\*b</sup> Paulo Piquini<sup>c</sup> and Manfred Höerner<sup>b</sup>**

08.01.2014.

Table S1. Crystallographic data and refinement parameters for **1**, **2** and **3**

|                                                                                  | <b>1</b>                                                                                                                       | <b>2</b>                                                                                       | <b>3</b>                                                                                          |
|----------------------------------------------------------------------------------|--------------------------------------------------------------------------------------------------------------------------------|------------------------------------------------------------------------------------------------|---------------------------------------------------------------------------------------------------|
| Empirical formula                                                                | C <sub>54</sub> H <sub>68</sub> Cl <sub>6</sub> Hg <sub>4</sub> N <sub>2</sub> O <sub>14</sub> Pd <sub>2</sub> Te <sub>6</sub> | C <sub>32</sub> H <sub>36</sub> Cl <sub>4</sub> Hg <sub>4</sub> O <sub>8</sub> Te <sub>4</sub> | C <sub>150</sub> H <sub>134</sub> N <sub>2</sub> O <sub>2</sub> Pd <sub>12</sub> Te <sub>24</sub> |
| Fw                                                                               | 2962.56                                                                                                                        | 2003.17                                                                                        | 6335.78                                                                                           |
| <i>T</i> (K)                                                                     | 293(2)                                                                                                                         | 296(2)                                                                                         | 293(2)                                                                                            |
| Crystal system                                                                   | triclinic                                                                                                                      | monoclinic                                                                                     | monoclinic                                                                                        |
| Space group                                                                      | <i>P</i> $\bar{1}$                                                                                                             | <i>P</i> 2 <sub>1</sub> / <i>c</i>                                                             | <i>C</i> 2/ <i>c</i>                                                                              |
| <i>a</i> /Å                                                                      | 10.5718(4)                                                                                                                     | 13.6219(17)                                                                                    | 35.392(3)                                                                                         |
| <i>b</i> /Å                                                                      | 11.4215(5)                                                                                                                     | 12.3303(14)                                                                                    | 19.4685(17)                                                                                       |
| <i>c</i> /Å                                                                      | 15.7806(7)                                                                                                                     | 14.266(2)                                                                                      | 25.583(2)                                                                                         |
| $\alpha$ /deg                                                                    | 79.158(2)                                                                                                                      | 90                                                                                             | 90                                                                                                |
| $\beta$ /deg                                                                     | 81.398(2)                                                                                                                      | 114.291(3)                                                                                     | 92.237(6)                                                                                         |
| $\gamma$ /deg                                                                    | 80.819(2)                                                                                                                      | 90                                                                                             | 90                                                                                                |
| <i>V</i> /Å <sup>3</sup>                                                         | 1833.36(13)                                                                                                                    | 2184.0(5)                                                                                      | 17614(3)                                                                                          |
| <i>Z</i>                                                                         | 1                                                                                                                              | 2                                                                                              | 4                                                                                                 |
| $\rho_{\text{calcd}}$ (g cm <sup>-3</sup> )                                      | 2.683                                                                                                                          | 3.046                                                                                          | 2.389                                                                                             |
| $\mu$ (Mo K $\alpha$ ) (mm <sup>-1</sup> )                                       | 11.438                                                                                                                         | 16.923                                                                                         | 5.134                                                                                             |
| $\lambda$ /Å                                                                     | 0.71073                                                                                                                        | 0.71073                                                                                        | 0.71073                                                                                           |
| <i>F</i> (000)                                                                   | 1344                                                                                                                           | 1776                                                                                           | 11456                                                                                             |
| Index ranges                                                                     | -14< <i>h</i> <14,-15< <i>k</i> <15,-22< <i>l</i> <21                                                                          | -18< <i>h</i> <18,-17< <i>k</i> <16,-19< <i>l</i> <19                                          | -48< <i>h</i> <49,-27< <i>k</i> <25,-35< <i>l</i> <35                                             |
| Collected reflns.                                                                | 36375                                                                                                                          | 22911                                                                                          | 175629                                                                                            |
| Unique reflns.                                                                   | 10372                                                                                                                          | 6133                                                                                           | 24752                                                                                             |
| GOF ( <i>F</i> <sup>2</sup> )                                                    | 1.050                                                                                                                          | 1.040                                                                                          | 1.026                                                                                             |
| <i>R</i> <sub>1</sub> <sup><i>a</i></sup> {[ <i>I</i> >2 $\sigma$ ( <i>I</i> )]} | 0.0404                                                                                                                         | 0.0199                                                                                         | 0.0749                                                                                            |
| <i>wR</i> <sub>2</sub> <sup><i>b</i></sup> (all data)                            | 0.0971                                                                                                                         | 0.0413                                                                                         | 0.2018                                                                                            |

$$^a R_1 = \sum ||F_o| - |F_c|| / \sum |F_o|. \quad ^b wR_2 = \{ \sum w(F_o^2 - F_c^2)^2 / \sum w(F_o^2)^2 \}^{1/2}.$$

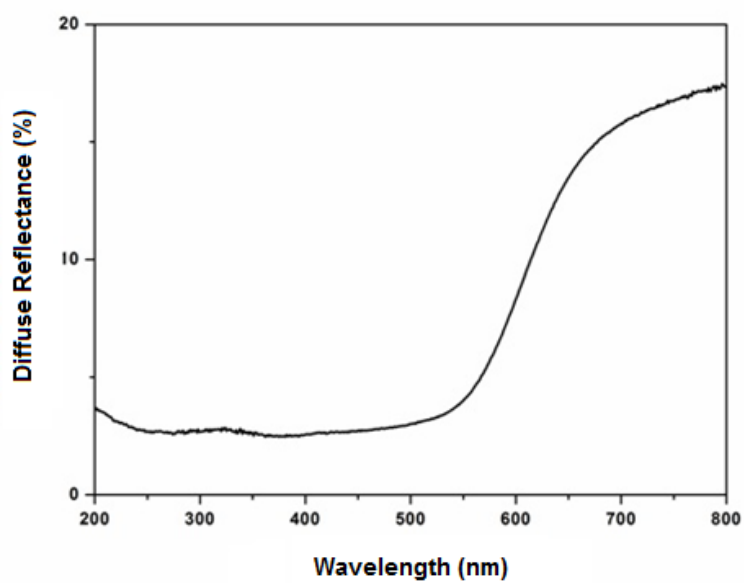

Figure S1. Diffuse reflectance spectrum  $\{r = (R_{\text{Sample}} / (R_{\text{Std}} - R_{\text{Noise}}))\}$  of **1**.

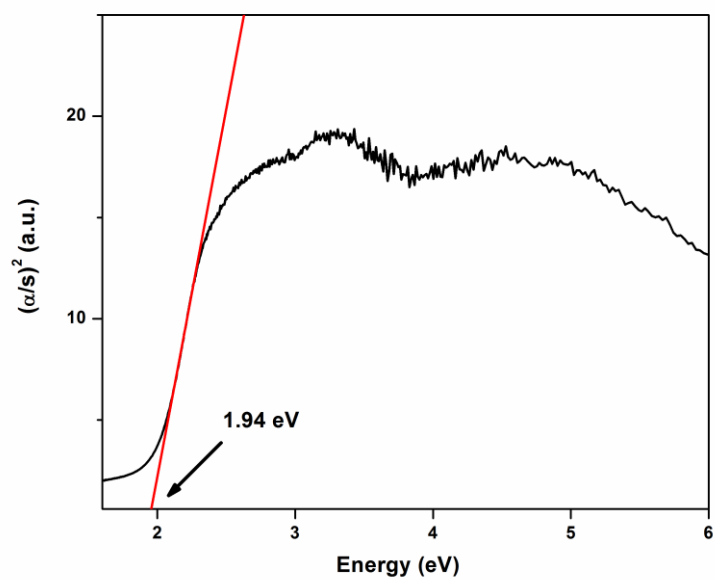

Figure S2. Graphical determination of the  $E_g$  value of **1** (1.94 eV).<sup>[20]</sup>

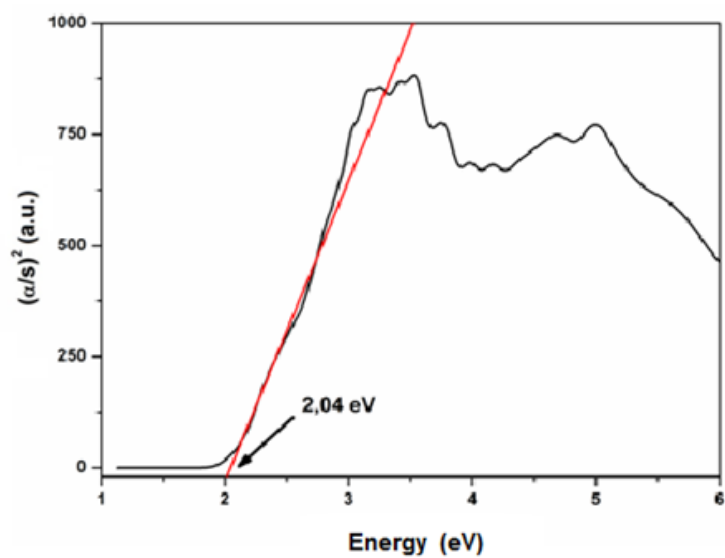

Figure S3. Graphical determination of the  $E_g$  value of **2** (2.04 eV).<sup>[20]</sup>

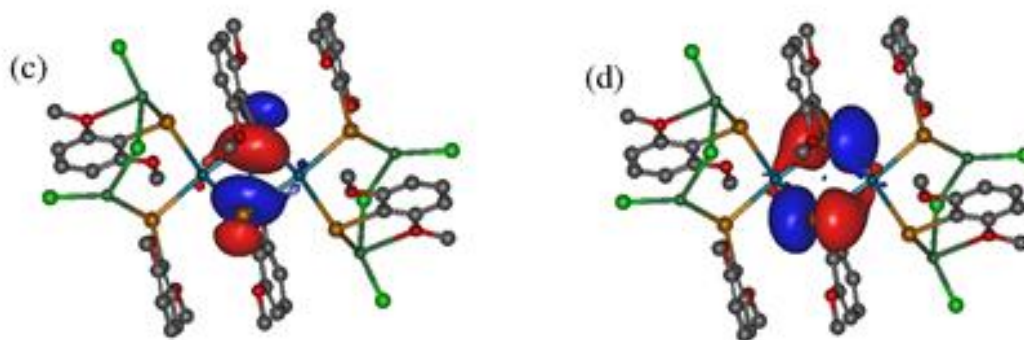

Figure S4. The two anti-bonding 'bridging' Te1-Te1' orbitals of **1**,
